# Supplementary material
Source: PubMed Central journal article supplement (PMC3982736)
Supplement: supp_pp.113.228379_228379supp.pdf [file supp_pp.113.228379_228379supp.pdf]

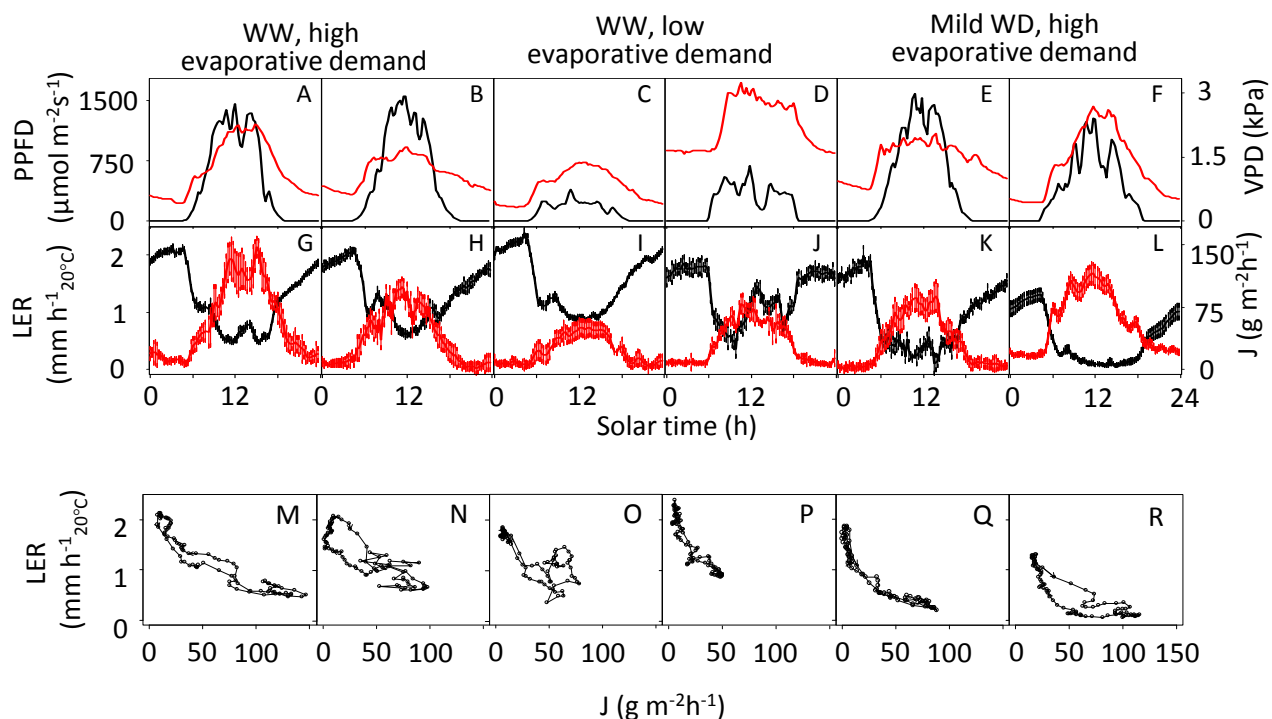

**Supplementary Fig. 1.** (panels A-L common to Fig. 1 main text, for better legibility of panels M-R) Daily time courses of environmental conditions, transpiration (J) and leaf elongation rate (LER) and the relationship between LER and E in six groups of experiments. Panels A, B, G, H, M and N, experiments 8 and 11 (82 and 149 time courses, respectively) with well watered plants and high evaporative demand. Panels C, D, I, J, O and P, experiments 9 and 19 (152 and 76 time courses, respectively) with well watered plants and low evaporative demand. Panels E, F, K, L, Q and R, experiments 6 and 7 (93 and 81 time courses, respectively) with very mild water deficit (soil water potential of  $-0.15 \pm 0.05$  and  $-0.3 \pm 0.05$  MPa) and high evaporative demand. Panels A-F: red, air vapour pressure deficit (VPD); black photosynthetic photon flux density (PPFD). Panels G-L: red, J; black, LER. Error bars, confidence interval at  $p < 0.05$

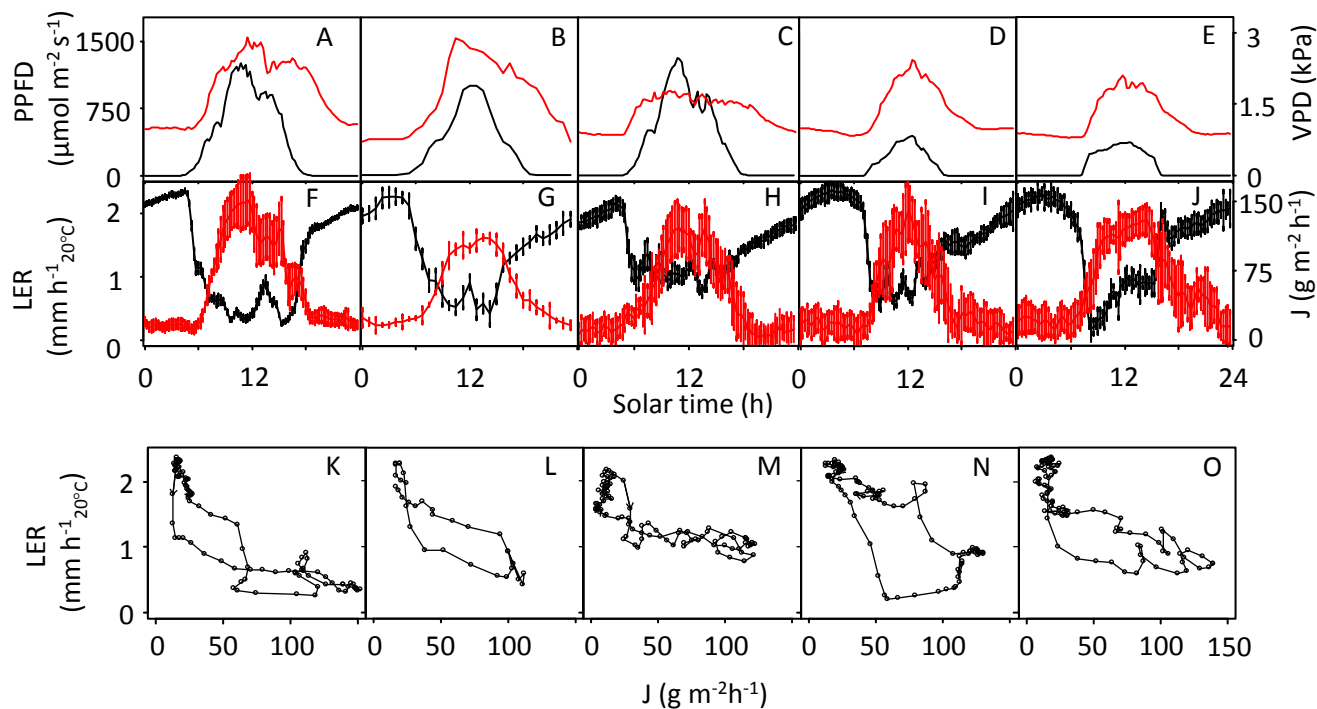

**Supplementary Fig. 2.** Daily time courses of environmental conditions, transpiration (J) and leaf elongation rate (LER) and the relationship between LER and J in five groups of experiments. Panels A, B, F, K and L, experiments 21 and 22 (259 and 40 time courses, respectively) with well watered plants and high evaporative demand. Panels C, H and M, experiments 13 (48 time courses) with well watered plants and low evaporative demand. Panels D, E, I, J, N and O, experiments 15 and 16 (40 and 48 time courses, respectively) with well watered plants performed during the long winter nights. Panels A-E: red, air vapour pressure deficit (VPD); black photosynthetic photon flux density (PPFD). Panels F-J: red, J; black LER. Error bars, confidence interval at  $p < 0.05$

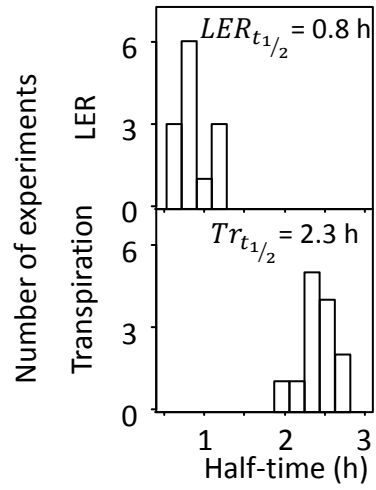

**Supplementary Fig. 3.** Half-times of reductions in leaf elongation rate and of increase in transpiration during the morning in 13 experiments (6 to 16, 20 and 22; SI Table 1).

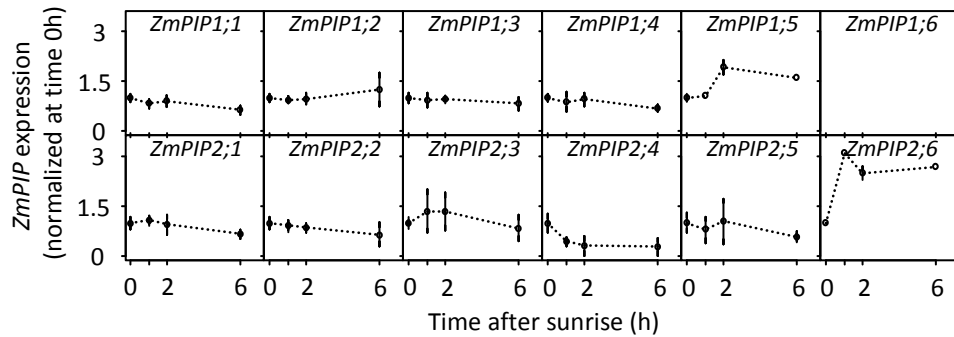

**Supplementary Fig. 4.** Expression levels (measured by quantitative RT-PCR ) of 12 *ZmPIP* genes in the leaf growth zone during the morning. Samples were collected from plants grown in soil substrate (Exp 6 in Table 1) under mild water deficit (-0.15 MPa) along the morning (30 before [0h] dawn and 1,2 and 6 hours after sunrise). The geometric mean of the expression level of three control genes (ACT1, EF1-a and polyubiquitin) was used to normalize the data. Each point, mean value (n = 3-5). Error bars, confidence intervals ( $p < 0.05$ ). A star indicate significant variation ( $p < 0.05$ ) of expression levels related to time 0h in a Kruskal-Wallis test.

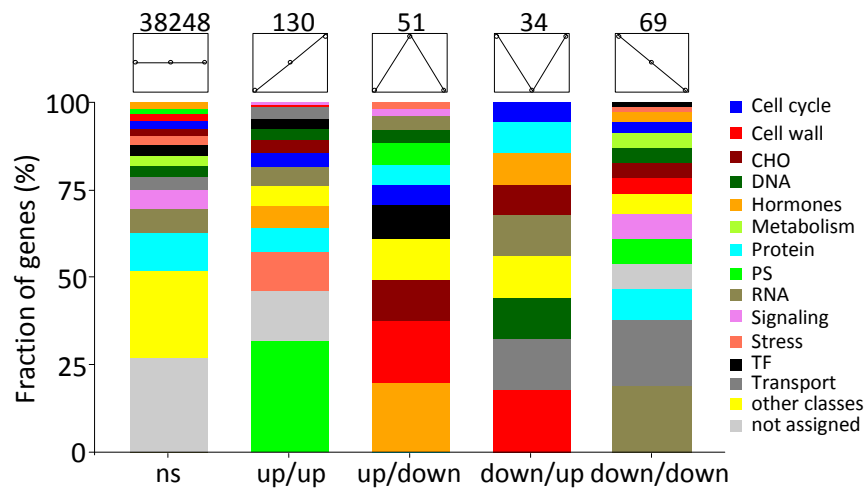

**Supplementary Fig. 5.** Overview of the genome-wide transcriptome analysis performed in the growing zone of leaves of the génotype B73 sampled 30 before dawn (first point in the boxes), 1h30 and 3 hours after sunrise (Exp. 6) . Cluster of genes with (i) non-significant trend (ns), (ii) continuous increase (up/up) (iii) fast increase after 1h30 followed by decrease after 3h (up/down), (iv) opposite pattern (down/up) and (v) continuous decrease (down/down). The numbers above each pattern stand for the number of putative genes in each category. Colors in bars represent the categories of genes following the ontology in MapMan.

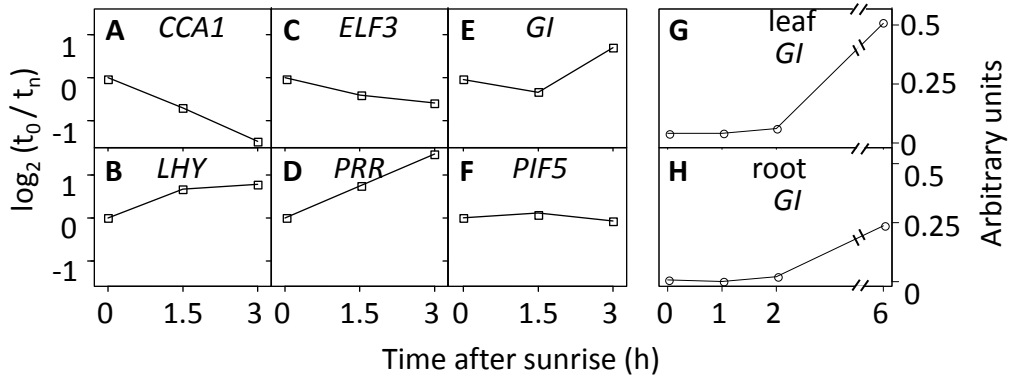

**Supplementary Fig. 6.** Time courses of the ratio of expression levels of the core oscillator genes in the leaf growing zone (A-G) and roots (H) of plants of the genotype B73 grown in soil substrate (experiment 6 in Table 1) under mild water deficit (soil water potential,  $-0.15 \pm 0.05$  MPa). Genome-wide transcriptome (A-F) and quantitative RT-PCR (GH) analysis of: A, CIRCADIAN CYCLE ASSOCIATED 1 (CCA1); B, LATE ELONGATED HYPOCOTYL (LHY); C, EARLY FLOWERING 3 (ELF3); D, PSEUDO RESPONSE REGULATOR (PRR); EGH, GIGANTEA (GI); F, PHYTOCHROME INTERACTING FACTOR 5 (PIF5). Ratio of expression level at a given time ( $t_n$ ) to the reference level at time 0h (30 minutes before dawn) was defined as  $\log_2(t_n/t_0)$  in the genome-wide transcriptome analysis (A-F).

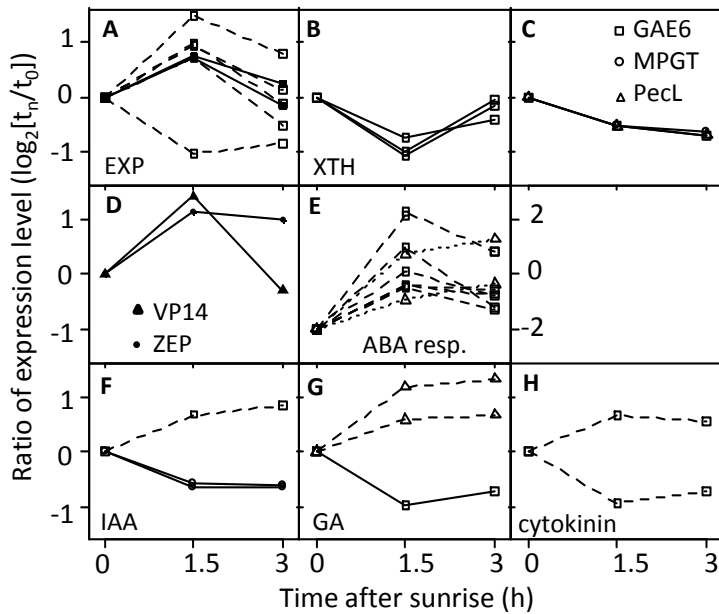

**Supplementary Fig. 7.** Patterns of ratio of expression level of genes associated with cell wall expansion (ABC), phytohormones biosynthesis and phytohormone response (D-H). Ratio of expression level at a given time ( $t_n$ ) to the reference level at time 0h (30 minutes before dawn). A, seven putative expansin genes (plain lines, expansin a4 and b2; dotted lines, other putative expansins). B, two putative genes encoding xyloglucan endotransglucosylase/hydrolase (XTH). C, three putative cell wall expansion genes : squares, UDP-glucuronate 4-epimerase 6; circles, mannose-1-phosphate guanyltransferase; triangles, Pectate lyase. D, two abscisic acid (ABA) biosynthesis genes: triangles, *vp14*; circles, zeaxanthin epoxidase . E, eight ABA responsive genes. F, two auxin (IAA) biosynthesis genes (plain lines) and one IAA responsive genes (dotted line). G, one gibberelin (GA) biosynthesis (GA-20, plain line) and two GA responsive genes (dotted lines). H, Two putative genes encoding cytokinin-activating proteins.

**Supplementary Table 1.** Environmental conditions and lines used in the twenty three experiments realized in the Phenodyn platform. Mean half times of the time courses of leaf elongation rate ( $t_{1/2LER}$ ) and transpiration ( $t_{1/2J}$ ) during changes in the early morning

| Exp | Genotypes        | Place | Growing medium | $T_{min}^a/T_{max}^a$ (°C) | $VPD_{max}$ (kPa) | PPFD ( $\mu\text{mol m}^{-2}\text{s}^{-1}$ ) | $t_{1/2LER}$ (h) | $t_{1/2J}$ (h) |
|-----|------------------|-------|----------------|----------------------------|-------------------|----------------------------------------------|------------------|----------------|
| 1   | NCED (AS, WT, S) | GH    | S              | 22/30                      | 2.2               | 900                                          | -                | -              |
| 2-4 | B73              | GC    | S              | 28                         | 2.8               | 600                                          | -                | -              |
| 5   | B73              | GH    | H              | 18/27                      | 2.7               | 800                                          | -                | -              |
| 6   | B73              | GH    | S              | 19/29                      | 2.3               | 1100                                         | 0.75             | 2.37           |
| 7   | B73              | GH    | S              | 18/30                      | 2.7               | 1500                                         | 1.25             | 2.13           |
| 8   | B73              | GH    | S              | 18/30                      | 2.5               | 1400                                         | 0.75             | 3.00           |
| 9   | B73              | GH    | S              | 18/29                      | 1.2               | 200                                          | 0.87             | 2.75           |
| 10  | B73              | GH    | S              | 18/28                      | 2.3               | 1400                                         | 1.00             | 2.75           |
| 11  | B73              | GH    | S              | 18/29                      | 3                 | 1500                                         | 0.87             | 2.25           |
| 12  | B73              | GH    | S              | 17/30                      | 2                 | 1200                                         | 0.75             | 3.12           |
| 13  | B73              | GH    | S              | 18/31                      | 2.4               | 1300                                         | 0.50             | 2.12           |
| 14  | B73              | GH    | S              | 18/32                      | 2.1               | 1200                                         | 0.75             | 1.5            |
| 15  | B73              | GH    | S              | 15/30                      | 2.3               | 500                                          | 0.50             | 1.38           |
| 16  | B73              | GH    | S              | 15/30                      | 2.4               | 500                                          | 0.62             | 1.75           |
| 17  | B73              | GH    | S              | 21/28                      | 2.8               | 450                                          | -                | -              |
| 18  | B73              | GH    | S              | 20/27                      | 3.1               | 500                                          | -                | -              |
| 19  | B73              | GH    | S              | 19/30                      | 3                 | 550                                          | -                | -              |
| 20  | B73              | GH    | S              | 20/25                      | 2.4               | 750                                          | 1.25             | 2.38           |
| 21  | B73              | GH    | S              | 20/31                      | 2.8               | 1100                                         | -                | -              |
| 22  | B73              | GH    | S              | 22/31                      | 2.2               | 1200                                         | 1.12             | 2.25           |
| 23  | B73              | GH    | S              | 20/30                      | 3                 | 1500                                         | -                | -              |

GH: greenhouse, GC: growth chamber, S: soil, H: hydroponics.
